# Supplementary material for: Drug–Drug Interaction Potential of Darolutamide: In Vitro and Clinical Studies
Source: Springer Nature journal article supplement (doi:10.1007/s13318-019-00577-5), 2019-09-30
Supplement: MOESM1 [file 24106988]

Supplementary Materials

Supplement to: Drug–Drug Interaction Potential of Darolutamide: *In Vitro* and Clinical Studies.

Christian Zurth<sup>1</sup> · Mikko Koskinen<sup>2</sup> · Robert Fricke<sup>3</sup> · Olaf Prien<sup>1</sup> · Timo Korjamo<sup>2</sup> · Kristina Graudenz<sup>1</sup> · Karsten Denner<sup>1</sup> · Michaela Bairlein<sup>3</sup> · Clemens-Jeremias von Bühler<sup>3</sup> · Gary Wilkinson<sup>1</sup> · Hille Gieschen<sup>1</sup>

<sup>1</sup>Bayer AG, Berlin, Germany; <sup>2</sup>Orion Corporation Orion Pharma, Espoo, Finland,

<sup>3</sup>Bayer AG, Wuppertal, Germany.

Table of Contents

|                                                                                                                                                                                                                                                      |    |
|------------------------------------------------------------------------------------------------------------------------------------------------------------------------------------------------------------------------------------------------------|----|
| Table S1 Suppliers of materials for <i>in vitro</i> studies .....                                                                                                                                                                                    | 3  |
| Table S2 Blood and urine sampling schedules for phase I clinical trials with (a) a strong CYP3A4/P-gp and BCRP inhibitor and a CYP3A4 / P-gp inducer, (b) CYP3A4 and P-gp substrates, and (c) a substrate for BCRP, OATP1B1, OATP1B3, and OAT3 ..... | 8  |
| Table S3 <i>In vitro</i> analysis of UGT isoform inhibition by (S,R)-darolutamide, (S,S)-darolutamide, and keto-darolutamide in human liver microsomes using standard substrates.....                                                                | 30 |
| Table S4 Potential risk for DDI induction with darolutamide in the clinic using the RIS method .....                                                                                                                                                 | 31 |

|                                                                                                                                                                                                                                                                                                                                                                                                                                                  |    |
|--------------------------------------------------------------------------------------------------------------------------------------------------------------------------------------------------------------------------------------------------------------------------------------------------------------------------------------------------------------------------------------------------------------------------------------------------|----|
| Table S5 Summary of PK data from the phase I studies: (a) effect of itraconazole and rifampicin on the pharmacokinetics of darolutamide, its diastereomers, and keto-darolutamide, (b) effect of rosuvastatin coadministration on the pharmacokinetics of darolutamide, its diastereomers, and keto-darolutamide, and (c) effect of darolutamide coadministration on pharmacokinetic parameters of dabigatran, midazolam, and rosuvastatin ..... | 32 |
| Table S6 Summary of the DDI potential of darolutamide and AR inhibitors with CYP enzymes and drug transporters [1-7].....                                                                                                                                                                                                                                                                                                                        | 36 |
| Fig. S1 <i>In vitro</i> effects of darolutamide on efflux transporters (a) P-gp, with digoxin as the probe substrate, and (b) BCRP, with cladribine as the probe substrate ....                                                                                                                                                                                                                                                                  | 38 |
| Fig. S2 Mean plasma concentration–time profiles of (a) darolutamide and (b) keto-darolutamide after multiple oral doses of 600 mg BID (Day 7) and given in combination with a single oral dose of 5 mg rosuvastatin (Day 8) in Treatment Period 2 (N = 29).....                                                                                                                                                                                  | 40 |
| Supplementary Methods: Bioanalytical Methods used in the Phase I Clinical Trials .....                                                                                                                                                                                                                                                                                                                                                           | 41 |
| References.....                                                                                                                                                                                                                                                                                                                                                                                                                                  | 46 |

**Table S1 Suppliers of materials for *in vitro* studies**

| Study                                                                                       | Material                                                                                        | Supplier                                                                                           |
|---------------------------------------------------------------------------------------------|-------------------------------------------------------------------------------------------------|----------------------------------------------------------------------------------------------------|
| <b>Substrate characteristics for drug metabolizing enzymes</b>                              | Human male hepatocytes                                                                          | Bioreclamation IVT, Baltimore, MD, USA;<br>Triangle Research Labs, Triangle Research Park, NC, USA |
|                                                                                             | Donor 1 HH-TWT, Donor 2 HH-TZU, Donor 3 HH-4070B                                                |                                                                                                    |
|                                                                                             | Pooled human renal microsomes (15 mixed gender donors): lot 510251                              | Xenotech LLC, Lenexa, KS, USA                                                                      |
|                                                                                             | Pooled human liver cytosol (200 mixed gender donors): lot 1310087, 1410012                      |                                                                                                    |
|                                                                                             | Pooled human liver microsomes (200 mixed gender donors): Xtreme 200 lot 1010420 and lot 1210223 |                                                                                                    |
|                                                                                             | Pooled human intestinal microsomes (15 mixed gender donors): lot 510408                         |                                                                                                    |
| Human liver microsomes (single donor): HH13, H023, HK25, H030, H032, H066, H088, H089, H093 | BD Gentest Corp., Woburn, MA, USA                                                               |                                                                                                    |

|                                                              |                                                                                                                     |                                                                               |
|--------------------------------------------------------------|---------------------------------------------------------------------------------------------------------------------|-------------------------------------------------------------------------------|
|                                                              | Recombinant CYP isoforms; Supersomes™                                                                               | Corning, Woburn, MA, USA                                                      |
|                                                              | Recombinant AKR isoforms                                                                                            | Bayer AG, Berlin, Germany                                                     |
|                                                              | UDPGA                                                                                                               | Sigma-Aldrich GmbH, Steinheim, Germany                                        |
| <b>Substrate characteristics for drug transporters</b>       | Caco-2, CPT-B1 and CPT-P1 cells                                                                                     | American Type Culture Collections, Rockville, MD, USA                         |
|                                                              | BCRP-MDCK cells                                                                                                     | Absorption Systems, Exton, PA, USA                                            |
|                                                              | Atorvastatin, cladribine, cyclosporin A, digoxin, Ko143 and rifamycin; HEK cells                                    | Sigma, St Louis, MO, USA                                                      |
|                                                              | Decynium 22                                                                                                         | Sigma-Aldrich GmbH, Steinheim, Germany                                        |
|                                                              | <sup>3</sup> H-MPP+                                                                                                 | American Radiolabeled Chemicals, St Louis, MO, USA                            |
| <b>Inhibitory potential of darolutamide for CYP isoforms</b> | Pooled human liver microsomes Xtreme 200 lot 1210223 (200 mixed gender donors) and lot TWE (25 mixed gender donors) | In Vitro Technologies, Inc, Baltimore, MD and XenoTech LLC, Lenexa, KS, USA); |

|                                                              |                                                                                                                          |                                                                      |
|--------------------------------------------------------------|--------------------------------------------------------------------------------------------------------------------------|----------------------------------------------------------------------|
|                                                              | Bufuralol, bupropion, coumarin, diclofenac, paclitaxel, phenacetin, S-mephenytoin,                                       | Sigma-Aldrich GmbH, Steinheim, Germany                               |
|                                                              | Chlorzoxazone, testosterone,                                                                                             | Acros Organics, Geel, Belgium                                        |
|                                                              | Midazolam                                                                                                                | Fagron BV, Nieuwerkerk a/d IJssel, The Netherlands                   |
|                                                              | NADPH                                                                                                                    | Sigma, Zwijndrecht, The Netherlands                                  |
| <b>Inhibitory potential of darolutamide for UGT isoforms</b> | Pooled human liver microsomes Xtreme 200 lot 1210223 (200 mixed gender donors) and lot 1010420 (200 mixed gender donors) | BD Biosciences, Woburn, MA, USA                                      |
|                                                              | Pooled human liver microsomes UltraPool™ HLM 150 lot 38290 (150 mixed gender donors)                                     |                                                                      |
|                                                              | Single donor: HH13, H023, HK25, H030, H032, H066, H088, H089, H093                                                       |                                                                      |
|                                                              | UGT-selective substrates                                                                                                 |                                                                      |
| <b>Induction potential of darolutamide for CYP isoforms</b>  | Primary-cultured human hepatocytes                                                                                       | Triangle Research Labs, LLC, NC and Bioreclamation IVT, LLC, NY, USA |

|                                                                   |                                                                                                 |                                                       |
|-------------------------------------------------------------------|-------------------------------------------------------------------------------------------------|-------------------------------------------------------|
|                                                                   | Donor 1 lot no. HUM4082A (male), Donor 2 lot no. HUM4112 (female), Donor 3 lot no. OII (female) |                                                       |
|                                                                   | Omeprazole, penicillin, phenacetin, phenobarbital, pioglitazone, rifampicin                     | Sigma-Aldrich GmbH, Steinheim, Germany                |
|                                                                   | S-mephenytoin                                                                                   | Enzo Life Sciences GmbH, Lörrach, Germany             |
|                                                                   | Testosterone                                                                                    | Fluka, Munich, Germany                                |
|                                                                   | Bosentan                                                                                        | USP, Maryland, United States                          |
| <b>Inhibitory potential of darolutamide for drug transporters</b> | Caco-2 cells                                                                                    | American Type Culture Collections, Rockville, MD, USA |
|                                                                   | MDCK cells                                                                                      | Absorption Systems, Exton, PA, USA                    |
|                                                                   | Sandwich-cultured human hepatocytes                                                             | Triangle Research Labs, LLC, NC, USA                  |
|                                                                   | HEK cells (Cat# CRL-1573™)                                                                      | American Type Culture Collections, Rockville, MD, USA |

---

Atorvastatin, cladribine, digoxin, imipramine,  
MMP<sup>+</sup>, *p*-aminohippuric acid, probenecid

Sigma, St Louis, MO, USA

---

Taurocholic acid

Matrix Scientific, Columbia, SC, USA

---

5(6)-carboxy-2,7'-dichlorofluorescein,  
benbromarone, cimetidine, cyclosporin A,  
decynium 22, estrone-3-sulfate, furosemide,  
gilbenclamide, metformin, pravastatin,  
pyrimethamine, rifamycin

Sigma Aldrich, Deisenhofen, Germany

---

<sup>3</sup>H-MMP<sup>+</sup>

American Radiolabeled Chemicals, St  
Louis, MO, USA

---

<sup>3</sup>H-MPP<sup>+</sup>, <sup>3</sup>H-N-Methyl-4-phenylpyridinium; AKR, aldo-keto reductase; BCRP, breast cancer resistance protein; Caco-2, wildtype human colon adenocarcinoma; CPT-B1 cells, proprietary cell line with reduced expression on human BCRP; CPT-P1 cells, proprietary cell line with reduced expression on human P-gp; CYP, cytochrome P450; MDCK, Madin-Darby Canine Kidney; NADPH, nicotinamide adenine dinucleotide phosphate; P-gp, P-glycoprotein; UDPGA, uridine 5'-diphospho-glucuronic acid; UGT, uridine-diphosphate glucuronosyltransferase.

**Table S2 Blood and urine sampling schedules for phase I clinical trials with (a) a strong CYP3A4/P-gp and BCRP inhibitor and a CYP3A4 / P-gp inducer, (b) CYP3A4 and P-gp substrates, and (c) a substrate for BCRP, OATP1B1, OATP1B3, and OAT3**

(a)

| Study Period | Study Day(s)   | Time in relation to darolutamide dosing (hours) | Study drug administration <sup>a</sup> |              |            | Plasma samples  |                 |               | Blood / urine samples for laboratory examination |
|--------------|----------------|-------------------------------------------------|----------------------------------------|--------------|------------|-----------------|-----------------|---------------|--------------------------------------------------|
|              |                |                                                 | Darolutamide                           | Itraconazole | Rifampicin | Darolutamide PK | Itraconazole PK | Rifampicin PK |                                                  |
| Screening    | Days -28 to -1 |                                                 |                                        |              |            |                 |                 |               | X                                                |
|              | Day -1         | Pre-dose (morning)                              |                                        |              |            |                 |                 |               | X                                                |
| Period 1:    | Day 1          | -0.5                                            |                                        |              |            | X               |                 |               | X                                                |
|              |                | 0                                               | X                                      |              |            |                 |                 |               |                                                  |



| Study Period                  | Study Day(s) | Time in relation to darolutamide dosing (hours) | Study drug administration <sup>a</sup> |              |            | Plasma samples  |                 |               | Blood / urine samples for laboratory examination |
|-------------------------------|--------------|-------------------------------------------------|----------------------------------------|--------------|------------|-----------------|-----------------|---------------|--------------------------------------------------|
|                               |              |                                                 | Darolutamide                           | Itraconazole | Rifampicin | Darolutamide PK | Itraconazole PK | Rifampicin PK |                                                  |
| Darolutamide reference period | Day 2        | 0.5                                             |                                        |              |            | X               |                 |               | X <sup>b</sup>                                   |
|                               |              | 1                                               |                                        |              |            |                 |                 |               |                                                  |
|                               |              | 1.5                                             |                                        |              |            | X               |                 |               |                                                  |
|                               |              | 2                                               |                                        |              |            | X               |                 |               |                                                  |
|                               |              | 2.5                                             |                                        |              |            | X               |                 |               |                                                  |
|                               |              | 3                                               |                                        |              |            | X               |                 |               |                                                  |
|                               |              | 4                                               |                                        |              |            | X               |                 |               |                                                  |
|                               |              | 6                                               |                                        |              |            | X               |                 |               |                                                  |
|                               |              | 8                                               |                                        |              |            | X               |                 |               |                                                  |
|                               |              | 12                                              |                                        |              |            | X               |                 |               |                                                  |
|                               |              | 0                                               |                                        |              |            | X               |                 |               |                                                  |

| Study Period                                         | Study Day(s) | Time in relation to darolutamide dosing (hours) | Study drug administration <sup>a</sup> |              |            | Plasma samples  |                 |               | Blood / urine samples for laboratory examination |
|------------------------------------------------------|--------------|-------------------------------------------------|----------------------------------------|--------------|------------|-----------------|-----------------|---------------|--------------------------------------------------|
|                                                      |              |                                                 | Darolutamide                           | Itraconazole | Rifampicin | Darolutamide PK | Itraconazole PK | Rifampicin PK |                                                  |
|                                                      |              | 12                                              |                                        |              |            | X               |                 |               |                                                  |
|                                                      | Day 3        | 0                                               |                                        |              |            | X               |                 |               | X                                                |
|                                                      |              | 12                                              |                                        |              |            | X               |                 |               |                                                  |
|                                                      | Day 4        | 0                                               |                                        |              |            | X               |                 |               | X                                                |
| <b>Period 2:<br/>darolutamide<br/>+ itraconazole</b> | Day 1        | 0                                               |                                        | X            |            |                 |                 |               | X <sup>c</sup>                                   |
|                                                      |              | 12                                              |                                        | X            |            |                 |                 |               |                                                  |
|                                                      | Day 2        | 0                                               |                                        | X            |            |                 |                 |               |                                                  |
|                                                      | Day 3        | 0                                               |                                        | X            |            |                 |                 |               |                                                  |
|                                                      | Day 4        | 0                                               |                                        | X            |            |                 |                 |               | X <sup>b,c</sup>                                 |
|                                                      | Day 5        | -0.5                                            |                                        |              |            | X               | X               |               | X                                                |
|                                                      |              | 0                                               | X                                      | X            |            |                 |                 |               |                                                  |
|                                                      | 0.5          |                                                 |                                        |              | X          |                 |                 |               |                                                  |

| Study Period | Study Day(s) | Time in relation to darolutamide dosing (hours) | Study drug administration <sup>a</sup> |              |            | Plasma samples  |                 |               | Blood / urine samples for laboratory examination |
|--------------|--------------|-------------------------------------------------|----------------------------------------|--------------|------------|-----------------|-----------------|---------------|--------------------------------------------------|
|              |              |                                                 | Darolutamide                           | Itraconazole | Rifampicin | Darolutamide PK | Itraconazole PK | Rifampicin PK |                                                  |
|              |              | 1                                               |                                        |              |            | X               |                 |               |                                                  |
|              |              | 1.5                                             |                                        |              |            | X               |                 |               |                                                  |
|              |              | 2                                               |                                        |              |            | X               |                 |               |                                                  |
|              |              | 2.5                                             |                                        |              |            | X               |                 |               |                                                  |
|              |              | 3                                               |                                        |              |            | X               |                 |               |                                                  |
|              |              | 4                                               |                                        |              |            | X               |                 |               | X <sup>b</sup>                                   |
|              |              | 6                                               |                                        |              |            | X               |                 |               |                                                  |
|              |              | 8                                               |                                        |              |            | X               |                 |               |                                                  |
|              |              | 12                                              |                                        |              |            | X               |                 |               |                                                  |
|              | Day 6        | 0                                               |                                        | X            |            | X <sup>c</sup>  | X <sup>c</sup>  |               | X <sup>c</sup>                                   |
|              |              | 12                                              |                                        |              |            | X               |                 |               |                                                  |
|              | Day 7        | 0                                               |                                        | X            |            | X <sup>c</sup>  | X <sup>c</sup>  |               | X <sup>c</sup>                                   |

| Study Period                                       | Study Day(s) | Time in relation to darolutamide dosing (hours) | Study drug administration <sup>a</sup> |              |            | Plasma samples  |                 |               | Blood / urine samples for laboratory examination |
|----------------------------------------------------|--------------|-------------------------------------------------|----------------------------------------|--------------|------------|-----------------|-----------------|---------------|--------------------------------------------------|
|                                                    |              |                                                 | Darolutamide                           | Itraconazole | Rifampicin | Darolutamide PK | Itraconazole PK | Rifampicin PK |                                                  |
|                                                    |              | 12                                              |                                        |              |            | X               |                 |               |                                                  |
|                                                    | Day 8        | 0                                               |                                        |              |            | X               | X               |               | X                                                |
| <b>Period 3:<br/>darolutamide<br/>+ rifampicin</b> | Day 1        | 0                                               |                                        |              | X          |                 |                 |               | X <sup>c</sup>                                   |
|                                                    | Day 2        | 0                                               |                                        |              | X          |                 |                 |               |                                                  |
|                                                    | Day 3        | 0                                               |                                        |              | X          |                 |                 |               |                                                  |
|                                                    | Day 4        | 0                                               |                                        |              | X          |                 |                 |               | X <sup>b</sup>                                   |
|                                                    | Day 5        | 0                                               |                                        |              | X          |                 |                 |               |                                                  |
|                                                    | Day 6        | 0                                               |                                        |              | X          |                 |                 |               |                                                  |
|                                                    | Day 7        | 0                                               |                                        |              | X          |                 |                 |               | X <sup>b</sup>                                   |
|                                                    | Day 8        | -0.5                                            |                                        |              |            | X               |                 | X             | X                                                |
|                                                    |              | 0                                               |                                        | X            |            |                 |                 |               |                                                  |
|                                                    | 0.5          |                                                 |                                        |              |            | X               |                 |               |                                                  |

| Study Period | Study Day(s) | Time in relation to darolutamide dosing (hours) | Study drug administration <sup>a</sup> |              |            | Plasma samples  |                 |                | Blood / urine samples for laboratory examination |
|--------------|--------------|-------------------------------------------------|----------------------------------------|--------------|------------|-----------------|-----------------|----------------|--------------------------------------------------|
|              |              |                                                 | Darolutamide                           | Itraconazole | Rifampicin | Darolutamide PK | Itraconazole PK | Rifampicin PK  |                                                  |
|              |              | 1                                               |                                        |              |            | X               |                 |                |                                                  |
|              |              | 2                                               |                                        |              |            | X               |                 |                |                                                  |
|              |              | 2.5                                             |                                        |              |            | X               |                 |                |                                                  |
|              |              | 3                                               |                                        |              |            | X               |                 |                |                                                  |
|              |              | 4                                               |                                        |              |            | X               |                 |                | X <sup>b</sup>                                   |
|              |              | 6                                               |                                        |              |            | X               |                 |                |                                                  |
|              |              | 8                                               |                                        |              |            | X               |                 |                |                                                  |
|              |              | 12                                              |                                        |              | X          | X <sup>c</sup>  |                 |                |                                                  |
|              | Day 9        | 0                                               |                                        |              | X          | X <sup>c</sup>  |                 | X <sup>c</sup> | X                                                |
|              |              | 12                                              |                                        |              |            | X               |                 |                |                                                  |
|              | Day 10       | 0                                               |                                        |              | X          | X <sup>c</sup>  |                 | X <sup>c</sup> | X                                                |
|              |              | 12                                              |                                        |              |            | X               |                 |                |                                                  |

| Study Period     | Study Day(s)            | Time in relation to darolutamide dosing (hours) | Study drug administration <sup>a</sup> |              |            | Plasma samples  |                 |               | Blood / urine samples for laboratory examination |
|------------------|-------------------------|-------------------------------------------------|----------------------------------------|--------------|------------|-----------------|-----------------|---------------|--------------------------------------------------|
|                  |                         |                                                 | Darolutamide                           | Itraconazole | Rifampicin | Darolutamide PK | Itraconazole PK | Rifampicin PK |                                                  |
|                  | Day 11                  | 0                                               |                                        |              |            | X               |                 | X             | X                                                |
| <b>Follow-up</b> | Day 14 ± 3 <sup>d</sup> |                                                 |                                        |              |            |                 |                 |               | X                                                |

(b)

| Study Period                                        | Study Day(s)   | Time in relation to darolutamide dosing (hours) | Study drug administration <sup>a</sup> |           |            | Blood samples |               | Blood / urine samples for laboratory examination |
|-----------------------------------------------------|----------------|-------------------------------------------------|----------------------------------------|-----------|------------|---------------|---------------|--------------------------------------------------|
|                                                     |                |                                                 | Darolutamide                           | Midazolam | Dabigatran | Midazolam PK  | Dabigatran PK |                                                  |
| Screening                                           | Days -28 to -1 |                                                 |                                        |           |            |               |               | X                                                |
|                                                     | Day -1         | Pre-dose (morning)                              |                                        |           |            |               |               | X                                                |
| Period 1: midazolam and dabigatran reference period | Day 1          | -0.5 <sup>e</sup>                               |                                        |           |            | X             | X             | X                                                |
|                                                     |                | 0                                               |                                        | X         | X          |               |               |                                                  |
|                                                     |                | 0.25                                            |                                        |           |            | X             | X             |                                                  |
|                                                     |                | 0.5                                             |                                        |           |            | X             | X             |                                                  |
|                                                     |                | 1                                               |                                        |           |            | X             | X             |                                                  |
|                                                     |                | 1.5                                             |                                        |           |            |               | X             | X                                                |

| Study Period | Study Day(s) | Time in relation to darolutamide dosing (hours) | Study drug administration <sup>a</sup> |           |            | Blood samples |               | Blood / urine samples for laboratory examination |
|--------------|--------------|-------------------------------------------------|----------------------------------------|-----------|------------|---------------|---------------|--------------------------------------------------|
|              |              |                                                 | Darolutamide                           | Midazolam | Dabigatran | Midazolam PK  | Dabigatran PK |                                                  |
|              |              | 2                                               |                                        |           |            | X             | X             |                                                  |
|              |              | 2.5                                             |                                        |           |            | X             | X             |                                                  |
|              |              | 3                                               |                                        |           |            | X             | X             |                                                  |
|              |              | 4                                               |                                        |           |            | X             | X             |                                                  |
|              |              | 5                                               |                                        |           |            | X             | X             |                                                  |
|              |              | 6                                               |                                        |           |            | X             | X             |                                                  |
|              |              | 8                                               |                                        |           |            | X             | X             |                                                  |
|              |              | 10                                              |                                        |           |            | X             | X             |                                                  |
|              |              | 12                                              |                                        |           |            | X             | X             |                                                  |
|              |              | 15                                              |                                        |           |            | X             | X             |                                                  |
|              | Day 2        | 0                                               |                                        |           |            | X             | X             | X <sup>b</sup>                                   |
|              |              | 12                                              |                                        |           |            |               | X             |                                                  |



| Study Period                                                       | Study Day(s) | Time in relation to darolutamide dosing (hours) | Study drug administration <sup>a</sup> |           |            | Blood samples  |               | Blood / urine samples for laboratory examination |
|--------------------------------------------------------------------|--------------|-------------------------------------------------|----------------------------------------|-----------|------------|----------------|---------------|--------------------------------------------------|
|                                                                    |              |                                                 | Darolutamide                           | Midazolam | Dabigatran | Midazolam PK   | Dabigatran PK |                                                  |
|                                                                    | Day 3        | 0                                               |                                        |           |            |                | X             |                                                  |
|                                                                    | Day 4        | 0                                               |                                        |           |            |                | X             |                                                  |
| <b>Period 2:<br/>darolutamide +<br/>dabigatran +<br/>midazolam</b> | Day 1        | -1                                              |                                        |           |            |                |               | X <sup>f</sup>                                   |
|                                                                    |              | 0                                               | X                                      |           |            |                |               |                                                  |
|                                                                    |              | 12                                              | X                                      |           |            |                |               |                                                  |
|                                                                    | Day 2        | 0                                               | X                                      |           |            |                |               |                                                  |
|                                                                    |              | 12                                              | X                                      |           |            |                |               |                                                  |
|                                                                    |              | Day 3                                           | -1.5                                   |           |            | X              |               | X <sup>c</sup>                                   |
|                                                                    | -1.25        |                                                 |                                        |           |            |                | X             |                                                  |
|                                                                    | -1           |                                                 |                                        |           |            |                | X             |                                                  |
|                                                                    | -0.5         |                                                 |                                        |           |            |                | X             |                                                  |
|                                                                    | 0            | X                                               |                                        |           |            | X <sup>e</sup> |               |                                                  |

| Study Period | Study Day(s) | Time in relation to darolutamide dosing (hours) | Study drug administration <sup>a</sup> |           |            | Blood samples |                | Blood / urine samples for laboratory examination |
|--------------|--------------|-------------------------------------------------|----------------------------------------|-----------|------------|---------------|----------------|--------------------------------------------------|
|              |              |                                                 | Darolutamide                           | Midazolam | Dabigatran | Midazolam PK  | Dabigatran PK  |                                                  |
|              |              | 0.5                                             |                                        |           |            |               | X <sup>c</sup> |                                                  |
|              |              | 1                                               |                                        |           |            |               | X              |                                                  |
|              |              | 1.5                                             |                                        |           |            |               | X              |                                                  |
|              |              | 2                                               |                                        |           |            |               |                |                                                  |
|              |              | 2.5                                             |                                        |           |            |               | X              |                                                  |
|              |              | 3.5                                             |                                        |           |            |               | X              |                                                  |
|              |              | 4.5                                             |                                        |           |            |               | X              |                                                  |
|              |              | 6.5                                             |                                        |           |            |               | X              |                                                  |
|              |              | 8.5                                             |                                        |           |            |               | X              |                                                  |
|              |              | 10.5                                            |                                        |           |            |               | X              |                                                  |
|              |              | 12                                              | X                                      |           |            |               |                |                                                  |
|              |              | 13.5                                            |                                        |           |            |               | X              |                                                  |

| Study Period | Study Day(s) | Time in relation to darolutamide dosing (hours) | Study drug administration <sup>a</sup> |           |            | Blood samples |               | Blood / urine samples for laboratory examination |
|--------------|--------------|-------------------------------------------------|----------------------------------------|-----------|------------|---------------|---------------|--------------------------------------------------|
|              |              |                                                 | Darolutamide                           | Midazolam | Dabigatran | Midazolam PK  | Dabigatran PK |                                                  |
|              | Day 4        | -1.5                                            |                                        |           |            |               | X             |                                                  |
|              |              | 0                                               | X                                      |           |            |               |               | X <sup>b,c</sup>                                 |
|              |              | 10.5                                            |                                        |           |            |               | X             |                                                  |
|              |              | 12                                              | X                                      |           |            |               |               |                                                  |
|              | Day 5        | -1.5                                            |                                        |           |            |               | X             |                                                  |
|              |              | 0                                               | X                                      |           |            |               |               |                                                  |
|              |              | 12                                              | X                                      |           |            |               |               |                                                  |
|              | Day 6        | -1.5                                            |                                        |           |            |               | X             |                                                  |
|              |              | -0.5                                            |                                        |           |            |               |               | X <sup>b,e</sup>                                 |
|              |              | 0                                               | X                                      |           |            |               |               |                                                  |
|              |              | 12                                              | X                                      |           |            |               |               |                                                  |
|              | Day 7        | 0                                               | X                                      |           |            |               |               |                                                  |

| Study Period | Study Day(s) | Time in relation to darolutamide dosing (hours) | Study drug administration <sup>a</sup> |           |            | Blood samples  |                | Blood / urine samples for laboratory examination |
|--------------|--------------|-------------------------------------------------|----------------------------------------|-----------|------------|----------------|----------------|--------------------------------------------------|
|              |              |                                                 | Darolutamide                           | Midazolam | Dabigatran | Midazolam PK   | Dabigatran PK  |                                                  |
|              |              | 12                                              | X                                      |           |            |                |                |                                                  |
|              | Day 8        | 0                                               | X                                      |           |            |                |                |                                                  |
|              |              | 12                                              | X                                      |           |            |                |                |                                                  |
|              | Day 9        | -0.5                                            |                                        |           |            |                |                | X <sup>e</sup>                                   |
|              |              | 0                                               | X                                      | X         | X          | X <sup>c</sup> | X <sup>c</sup> |                                                  |
|              |              | 0.25                                            |                                        |           |            | X              | X              |                                                  |
|              |              | 0.5                                             |                                        |           |            | X              | X              |                                                  |
|              |              | 1                                               |                                        |           |            | X              | X              |                                                  |
|              |              | 1.5                                             |                                        |           |            | X              | X              |                                                  |
|              |              | 2                                               |                                        |           |            | X              | X              |                                                  |
|              |              | 2.5                                             |                                        |           |            | X              | X              |                                                  |
|              |              | 3                                               |                                        |           |            | X              | X              |                                                  |

| Study Period | Study Day(s) | Time in relation to darolutamide dosing (hours) | Study drug administration <sup>a</sup> |           |            | Blood samples  |                | Blood / urine samples for laboratory examination |
|--------------|--------------|-------------------------------------------------|----------------------------------------|-----------|------------|----------------|----------------|--------------------------------------------------|
|              |              |                                                 | Darolutamide                           | Midazolam | Dabigatran | Midazolam PK   | Dabigatran PK  |                                                  |
|              |              | 4                                               |                                        |           |            | X              | X              |                                                  |
|              |              | 5                                               |                                        |           |            | X              | X              |                                                  |
|              |              | 6                                               |                                        |           |            | X              | X              |                                                  |
|              |              | 8                                               |                                        |           |            | X              | X              |                                                  |
|              |              | 10                                              |                                        |           |            | X              | X              |                                                  |
|              |              | 11.5                                            |                                        |           |            |                |                |                                                  |
|              |              | 12                                              | X                                      |           |            | X <sup>c</sup> | X <sup>c</sup> |                                                  |
|              |              | 15                                              |                                        |           |            | X              | X              |                                                  |
|              | Day 10       | 0                                               | X                                      |           |            | X <sup>c</sup> | X <sup>c</sup> | X <sup>b,c</sup>                                 |
|              |              | 12                                              | X                                      |           |            |                | X <sup>c</sup> |                                                  |
|              | Day 11       | 0                                               | X                                      |           |            |                | X <sup>c</sup> |                                                  |
|              |              | 12                                              | X                                      |           |            |                |                |                                                  |

| Study Period     | Study Day(s)            | Time in relation to darolutamide dosing (hours) | Study drug administration <sup>a</sup> |           |            | Blood samples |               | Blood / urine samples for laboratory examination |
|------------------|-------------------------|-------------------------------------------------|----------------------------------------|-----------|------------|---------------|---------------|--------------------------------------------------|
|                  |                         |                                                 | Darolutamide                           | Midazolam | Dabigatran | Midazolam PK  | Dabigatran PK |                                                  |
|                  | Day 12                  | 0                                               |                                        |           |            |               | X             | X <sup>b</sup>                                   |
| <b>Follow-up</b> | Day 14 ± 3 <sup>e</sup> |                                                 |                                        |           |            |               |               | X <sup>f</sup>                                   |

(c)

| Study Period                            | Study Day(s)   | Time in relation to darolutamide dosing (hours) | Study drug administration <sup>a</sup> |              | Plasma samples  |                 | Urine samples   | Blood / urine samples for laboratory examination |  |
|-----------------------------------------|----------------|-------------------------------------------------|----------------------------------------|--------------|-----------------|-----------------|-----------------|--------------------------------------------------|--|
|                                         |                |                                                 | Darolutamide                           | Rosuvastatin | Darolutamide PK | Rosuvastatin PK | Rosuvastatin PK |                                                  |  |
| Screening                               | Days -28 to -1 |                                                 |                                        |              |                 |                 |                 | X                                                |  |
|                                         | Day -1         | Pre-dose (morning)                              |                                        |              |                 |                 |                 | X                                                |  |
| Period 1: rosuvastatin reference period | Day 1          | 0                                               |                                        | X            |                 | X <sup>c</sup>  | X <sup>g</sup>  |                                                  |  |
|                                         |                | 0.5                                             |                                        |              |                 | X               | →               |                                                  |  |
|                                         |                | 1                                               |                                        |              |                 |                 | X               | →                                                |  |
|                                         |                | 1.5                                             |                                        |              |                 |                 | X               | →                                                |  |
|                                         |                | 2                                               |                                        |              |                 |                 | X               | →                                                |  |

| Study Period                                         | Study Day(s) | Time in relation to darolutamide dosing (hours) | Study drug administration <sup>a</sup> |              | Plasma samples  |                 | Urine samples   | Blood / urine samples for laboratory examination |
|------------------------------------------------------|--------------|-------------------------------------------------|----------------------------------------|--------------|-----------------|-----------------|-----------------|--------------------------------------------------|
|                                                      |              |                                                 | Darolutamide                           | Rosuvastatin | Darolutamide PK | Rosuvastatin PK | Rosuvastatin PK |                                                  |
|                                                      |              | 2.5                                             |                                        |              |                 | X               | →               |                                                  |
|                                                      |              | 3                                               |                                        |              |                 | X               | →               |                                                  |
|                                                      |              | 4                                               |                                        |              |                 | X               | →               |                                                  |
|                                                      |              | 6                                               |                                        |              |                 | X               | X               |                                                  |
|                                                      |              | 8                                               |                                        |              |                 | X               | →               |                                                  |
|                                                      |              | 12                                              |                                        |              |                 | X               | →               |                                                  |
|                                                      |              | Day 2<br>0                                      |                                        |              |                 |                 | X               |                                                  |
| <b>Period 2:<br/>darolutamide +<br/>rosuvastatin</b> | Day -2       | 0                                               |                                        |              |                 |                 |                 | X <sup>h</sup>                                   |
|                                                      | Day 1        | 0                                               | X                                      |              | X <sup>c</sup>  |                 |                 |                                                  |
|                                                      |              | 0.5                                             |                                        |              | X               |                 |                 |                                                  |
|                                                      |              | 1                                               |                                        |              | X               |                 |                 |                                                  |



| Study Period | Study Day(s) | Time in relation to darolutamide dosing (hours) | Study drug administration <sup>a</sup> |              | Plasma samples  |                 | Urine samples   | Blood / urine samples for laboratory examination |
|--------------|--------------|-------------------------------------------------|----------------------------------------|--------------|-----------------|-----------------|-----------------|--------------------------------------------------|
|              |              |                                                 | Darolutamide                           | Rosuvastatin | Darolutamide PK | Rosuvastatin PK | Rosuvastatin PK |                                                  |
|              |              | 1.5                                             |                                        |              | X               |                 |                 |                                                  |
|              |              | 2                                               |                                        |              | X               |                 |                 |                                                  |
|              |              | 2.5                                             |                                        |              | X               |                 |                 |                                                  |
|              |              | 3                                               |                                        |              | X               |                 |                 |                                                  |
|              |              | 4                                               |                                        |              | X               |                 |                 |                                                  |
|              |              | 6                                               |                                        |              | X               |                 |                 |                                                  |
|              |              | 8                                               |                                        |              | X               |                 |                 |                                                  |
|              |              | 12                                              |                                        |              | X               |                 |                 |                                                  |
|              | Day 2        | 0                                               |                                        |              | X               |                 |                 | X                                                |
|              |              | 12                                              |                                        |              | X               |                 |                 |                                                  |
|              | Day 3        | 0                                               |                                        |              | X               |                 |                 |                                                  |
|              |              | 12                                              |                                        |              | X               |                 |                 |                                                  |

| Study Period | Study Day(s) | Time in relation to darolutamide dosing (hours) | Study drug administration <sup>a</sup> |              | Plasma samples  |                 | Urine samples   | Blood / urine samples for laboratory examination |
|--------------|--------------|-------------------------------------------------|----------------------------------------|--------------|-----------------|-----------------|-----------------|--------------------------------------------------|
|              |              |                                                 | Darolutamide                           | Rosuvastatin | Darolutamide PK | Rosuvastatin PK | Rosuvastatin PK |                                                  |
|              | Day 4        | 0                                               | X                                      |              | X <sup>c</sup>  |                 |                 | X <sup>c</sup>                                   |
|              |              | 12                                              | X                                      |              | X <sup>c</sup>  |                 |                 |                                                  |
|              | Day 5        | 0                                               | X                                      |              | X <sup>c</sup>  |                 |                 |                                                  |
|              |              | 12                                              | X                                      |              | X <sup>c</sup>  |                 |                 |                                                  |
|              | Day 6        | 0                                               | X                                      |              | X <sup>c</sup>  |                 |                 |                                                  |
|              |              | 12                                              | X                                      |              | X <sup>c</sup>  |                 |                 |                                                  |
|              | Day 7        | 0                                               | X                                      |              | X <sup>c</sup>  |                 |                 | X <sup>h</sup>                                   |
|              |              | 0.5                                             |                                        |              | X               |                 |                 |                                                  |
|              |              | 1                                               |                                        |              | X               |                 |                 |                                                  |
|              |              | 1.5                                             |                                        |              | X               |                 |                 |                                                  |
|              |              | 2                                               |                                        |              | X               |                 |                 |                                                  |
|              |              |                                                 | 2.5                                    |              |                 | X               |                 |                                                  |

| Study Period | Study Day(s) | Time in relation to darolutamide dosing (hours) | Study drug administration <sup>a</sup> |              | Plasma samples  |                 | Urine samples   | Blood / urine samples for laboratory examination |
|--------------|--------------|-------------------------------------------------|----------------------------------------|--------------|-----------------|-----------------|-----------------|--------------------------------------------------|
|              |              |                                                 | Darolutamide                           | Rosuvastatin | Darolutamide PK | Rosuvastatin PK | Rosuvastatin PK |                                                  |
|              |              | 3                                               |                                        |              | X               |                 |                 |                                                  |
|              |              | 4                                               |                                        |              | X               |                 |                 |                                                  |
|              |              | 6                                               |                                        |              | X               |                 |                 |                                                  |
|              |              | 8                                               |                                        |              | X               |                 |                 |                                                  |
|              |              | 12                                              | X                                      |              | X <sup>c</sup>  |                 |                 |                                                  |
|              | Day 8        | 0                                               | X                                      | X            | X <sup>c</sup>  | X <sup>c</sup>  | X <sup>g</sup>  | X                                                |
|              |              | 0.5                                             |                                        |              | X               | X               | →               |                                                  |
|              |              | 1                                               |                                        |              | X               | X               | →               |                                                  |
|              |              | 1.5                                             |                                        |              | X               | X               | →               |                                                  |
|              |              | 2                                               |                                        |              | X               | X               | →               |                                                  |
|              |              | 2.5                                             |                                        |              | X               | X               | →               |                                                  |

| Study Period     | Study Day(s)              | Time in relation to darolutamide dosing (hours) | Study drug administration <sup>a</sup> |              | Plasma samples  |                 | Urine samples   | Blood / urine samples for laboratory examination |
|------------------|---------------------------|-------------------------------------------------|----------------------------------------|--------------|-----------------|-----------------|-----------------|--------------------------------------------------|
|                  |                           |                                                 | Darolutamide                           | Rosuvastatin | Darolutamide PK | Rosuvastatin PK | Rosuvastatin PK |                                                  |
|                  | Day 9<br>Day 10<br>Day 11 | 3                                               |                                        |              | X               | X               | →               | X <sup>i</sup>                                   |
|                  |                           | 4                                               |                                        |              | X               | X               | →               |                                                  |
|                  |                           | 6                                               |                                        |              | X               | X               | X               |                                                  |
|                  |                           | 8                                               |                                        |              | X               | X               | →               |                                                  |
|                  |                           | 12                                              | X                                      |              | X <sup>c</sup>  | X               | →               |                                                  |
|                  |                           | 0                                               |                                        |              | X               | X               | X               |                                                  |
|                  |                           | 12                                              |                                        |              | X               |                 |                 |                                                  |
|                  | Day 11                    | 0                                               |                                        |              | X               |                 |                 |                                                  |
| <b>Follow-up</b> | Day 14 ± 3 <sup>e</sup>   |                                                 |                                        |              |                 |                 |                 | X <sup>f</sup>                                   |

<sup>a</sup>Darolutamide, itraconazole, midazolam, dabigatran and rosuvastatin were administered orally 30 minutes after starting a standardized meal and with 240 mL of water, whereas rifampicin was administered 1 hour before starting a standardized meal and, on the day of co-administration with darolutamide, 12 hour after darolutamide and 1 hour prior to a standardized evening meal); <sup>b</sup>only blood sample for creatine kinase, liver enzymes (AST, ALT, GGT), and alkaline phosphatase; <sup>c</sup>before study drug administration; <sup>d</sup>after last dose of study medication; <sup>e</sup>measures/actions completed before the start of the standardized breakfast; <sup>f</sup>in fasted state; <sup>g</sup>additional urine sample before dosing of

rosuvastatin; <sup>h</sup>results were checked the same day (latest in the evening) to decide whether the subject could continue participating in the study; <sup>i</sup>blood sample for creatine kinase and liver enzymes.

→, Done continuously from the time point indicated; ALT, alanine aminotransferase; AST, aspartate aminotransferase; GGT, gamma glutamyl transpeptidase.

**Table S3 *In vitro* analysis of UGT isoform inhibition by (S,R)-darolutamide, (S,S)-darolutamide, and keto-darolutamide in human liver microsomes using standard substrates**

| UGT isoform | Substrate       | IC <sub>50</sub> (μM) |                    |                   |
|-------------|-----------------|-----------------------|--------------------|-------------------|
|             |                 | (S,R)-darolutamide    | (S,S)-darolutamide | Keto-darolutamide |
| <b>1A1</b>  | Estradiol       | 26.5                  | 31.7               | 6.4               |
| <b>1A4</b>  | Trifluoperazine | >100                  | >100               | >50               |
| <b>1A6</b>  | Serotonin       | >100                  | >100               | >50               |
| <b>1A9</b>  | Propofol        | 12.5                  | >100               | >50               |
| <b>2B7</b>  | AZT             | >100                  | >100               | >50               |

AZT, 3'-azido-3'-deoxythymidine; IC<sub>50</sub>, concentration required for 50% inhibition; UGT, uridine diphosphate glucuronosyltransferase.

**Table S4 Potential risk for DDI induction with darolutamide in the clinic using the RIS method**

| Test compound             | % decrease in AUC of midazolam |         |         | Overall assessment         |
|---------------------------|--------------------------------|---------|---------|----------------------------|
|                           | Donor 1                        | Donor 2 | Donor 3 |                            |
| <b>Darolutamide</b>       | 82                             | 84      | 82      | Strong inducer             |
| <b>(S,R)-darolutamide</b> | 65                             | 71      | 64      | Moderate inducer           |
| <b>(S,S)-darolutamide</b> | 80                             | 83      | 81      | Moderate to strong inducer |
| <b>Keto-darolutamide</b>  | 58                             | 50      | 51      | Weak to moderate inducer   |

AUC, area under the curve; DDI, drug–drug interaction, RIS, relative induction score.

**Table S5 Summary of PK data from the phase I studies: (a) effect of itraconazole and rifampicin on the pharmacokinetics of darolutamide, its diastereomers, and keto-darolutamide, (b) effect of rosuvastatin coadministration on the pharmacokinetics of darolutamide, its diastereomers, and keto-darolutamide, and (c) effect of darolutamide coadministration on pharmacokinetic parameters of dabigatran, midazolam, and rosuvastatin**

**a.**



|                               | <b>Period 1</b>                                             | <b>Period 2</b>                                                         | <b>Period 3</b>                                                         |
|-------------------------------|-------------------------------------------------------------|-------------------------------------------------------------------------|-------------------------------------------------------------------------|
| <b>Parameter</b>              | <b>Reference Treatment<br/>Darolutamide 600 mg QD (Fed)</b> | <b>Darolutamide 600 mg QD (Fed) +<br/>Itraconazole 200 mg BID (Fed)</b> | <b>Darolutamide 600 mg QD (Fed) +<br/>Rifampicin 600 mg QD (Fasted)</b> |
| <b>Darolutamide</b>           |                                                             |                                                                         |                                                                         |
| AUC <sub>(0-12)</sub> µg·h/mL | 14.1/29.5 (7.41 - 22.0)                                     | 20.7 /24.1 (12.1 - 27.7)                                                | 5.42/31.7 (2.51 - 9.23)                                                 |
| C <sub>max</sub> µg/mL        | 1.86/25.1 (1.07-2.63)                                       | 2.53/19.6 (1.66-3.53)                                                   | 0.883/27.8 (0.514-1.48)                                                 |
| <b>(S,R)-darolutamide</b>     |                                                             |                                                                         |                                                                         |
| AUC <sub>(0-12)</sub> µg·h/mL | 3.34/38.1 (1.77-5.83)                                       | 5.32/28.7 (3.02-7.30)                                                   | 0.934/42.2 (0.360-1.76)                                                 |
| C <sub>max</sub> µg/mL        | 0.573/31.0 (0.269-0.835)                                    | 0.862/26.6 (0.539-1.33)                                                 | 0.210/39.3 (0.0957-0.412)                                               |
| <b>(S,S)-darolutamide</b>     |                                                             |                                                                         |                                                                         |
| AUC <sub>(0-12)</sub> µg·h/mL | 10.7/27.8 (5.61-16.3)                                       | 15.2/24.0 (9.06-20.3)                                                   | 4.45/30.4 (2.12-7.46)                                                   |
| C <sub>max</sub> µg/mL        | 1.36/23.5 (0.794-1.94)                                      | 1.87/20.0 (1.30-2.64)                                                   | 0.696/25.8 (0.418-1.07)                                                 |
| <b>Keto-darolutamide</b>      |                                                             |                                                                         |                                                                         |
| AUC <sub>(0-12)</sub> µg·h/mL | 31.4/29.1 (17.7-45.3)                                       | 47.2/24.3 (29.8-77.8)                                                   | 10.8/36.5 (4.81-20.0)                                                   |
| C <sub>max</sub> µg/mL        | 4.32/23.3 (2.64-6.10)                                       | 5.99/17.7 (4.33-8.85)                                                   | 2.04/27.2 (1.18-3.27)                                                   |

b.

|                               | <b>Period 2, Day 1</b><br><b>Darolutamide 600 mg,</b><br><b>Single Dose</b> | <b>Period 2, Day 7</b><br><b>Darolutamide 600 mg BID</b> | <b>Period 2, Day 8</b><br><b>Rosuvastatin 5 mg QD, Single Dose +</b><br><b>Darolutamide 600 mg BID</b> |
|-------------------------------|-----------------------------------------------------------------------------|----------------------------------------------------------|--------------------------------------------------------------------------------------------------------|
| <b>Darolutamide</b>           |                                                                             |                                                          |                                                                                                        |
| AUC <sub>(0-12)</sub> µg·h/mL | 16.7/30.2 (8.90-29.7)                                                       | 34.5/27.8 (20.2-56.9)                                    | 34.1/28.9 (18.6-54.3)                                                                                  |
| C <sub>max</sub> µg/mL        | 2.10/27.7 (1.14-3.30)                                                       | 3.84/25.1 (2.28-6.38)                                    | 3.72/25.3 (2.07-5.44)                                                                                  |
| <b>(S,R)-darolutamide</b>     |                                                                             |                                                          |                                                                                                        |
| AUC <sub>(0-12)</sub> µg·h/mL | 3.76/31.1 (1.85-7.03)                                                       | 4.67/32.4 (2.07-8.01)                                    | 4.75/28.8 (2.46-7.79)                                                                                  |
| C <sub>max</sub> µg/mL        | 0.62/0.03 (0.34-0.11)                                                       | 0.73/0.03 (0.42-0.11)                                    | 0.71/0.02 (0.39-0.11)                                                                                  |
| <b>(S,S)-darolutamide</b>     |                                                                             |                                                          |                                                                                                        |
| AUC <sub>(0-12)</sub> µg·h/mL | 12.9/30.6 (6.60-22.6)                                                       | 29.8/27.8 (17.6-48.9)                                    | 29.3/29.4 (15.7-46.9)                                                                                  |
| C <sub>max</sub> µg/mL        | 1.61/27.4 (0.910-2.45)                                                      | 3.17/25.1 (1.93-5.24)                                    | 3.09/27.0 (1.70-4.51)                                                                                  |
| <b>Keto-darolutamide</b>      |                                                                             |                                                          |                                                                                                        |
| AUC <sub>(0-12)</sub> µg·h/mL | 37.0/36.2 (19.0-69.2)                                                       | 82.8/39.5 (29.1-152)                                     | 82.5/38.7 (38.0-152)                                                                                   |
| C <sub>max</sub> µg/mL        | 4.89/35.6 (2.51-9.31)                                                       | 9.40/35.4 (3.66-16.7)                                    | 9.20/33.3 (4.35-16.2)                                                                                  |

**C.**

|                                  | <u>Period 1, Day 1</u><br>Dabigatran 75 mg, Single<br>Dose (Fed) | <u>Period 2, Day 9</u><br>Dabigatran 75 mg, Single<br>Dose (Fed) + Darolutamide<br>600 mg BID (Fed) | <u>Period 1, Day 1</u><br>Midazolam 1 mg, Single<br>Dose (Fed) | <u>Period 2, Day 9</u><br>Midazolam 1 mg, Single<br>Dose (Fed) + Darolutamide<br>600 mg BID | <u>Period 1, Day 1</u><br>Rosuvastatin 5 mg, Single<br>Dose | <u>Period 2, Day 8</u><br>Rosuvastatin 5 mg, Single<br>Dose + Darolutamide 600<br>mg BID |
|----------------------------------|------------------------------------------------------------------|-----------------------------------------------------------------------------------------------------|----------------------------------------------------------------|---------------------------------------------------------------------------------------------|-------------------------------------------------------------|------------------------------------------------------------------------------------------|
| AUC<br>µg·h/mL                   | 502 / 27.9 (338-929)                                             | 475 / 39.9 (214-818)                                                                                | 12.9 / 0.04 (5.90-20.1)                                        | 9.22 / 0.03 (4.75-14.0)                                                                     | –                                                           | –                                                                                        |
| AUC <sub>(0-24)</sub><br>µg·h/mL | –                                                                | –                                                                                                   | –                                                              | –                                                                                           | 6.52/40.5 (3.35-14.7)                                       | 33.8/41.3 (14.7-74.3)                                                                    |
| C <sub>max</sub> µg/L            | 52.6 / 28.8 (32.2-87.3)                                          | 44.1 / 60.1 (13.1-88.8)                                                                             | 3.17 / 0.03 (2.22-4.68)                                        | 2.15 / 0.03 (1.22-2.99)                                                                     | 0.660/47.4 (0.325-1.69)                                     | 3.31/42.5 (1.49-6.70)                                                                    |

Data are presented as geometric means/CV% (range) for PK populations.

AUC<sub>(0-12)</sub>, area under the plasma concentration time curve from time 0 to 12 hours; BID, twice-daily; C<sub>max</sub>, peak concentration; CV%, coefficient of variation; DABE, dabigatran etexilate; ICZ, itraconazole; MDZ, midazolam; PK, pharmacokinetic; RIF, rifampicin; RSV, rosuvastatin.

**Table S6 Summary of the DDI potential of darolutamide and AR inhibitors with CYP enzymes and drug transporters [1-7]**

| Category                                                                             | Enzyme/Transporter | Apalutamide | Enzalutamide | Darolutamide   |
|--------------------------------------------------------------------------------------|--------------------|-------------|--------------|----------------|
| <b>Substrates</b>                                                                    | CYP3A4             | ✓           | ✓            |                |
|                                                                                      |                    |             |              |                |
| <b>Addition of an AR inhibitor may affect the concentration of other medications</b> | CYP2C9             | ✓           | ✓            |                |
|                                                                                      | CYP2C19            | ✓           | ✓            |                |
|                                                                                      | UGT                | ✓           | ✓            |                |
|                                                                                      | P-gp               | ✓           | ✓            |                |
|                                                                                      | BCRP               | ✓           | ✓            | ✓ <sup>†</sup> |
|                                                                                      | OATP1B1            | ✓           | ✓            |                |
| <b>Inhibitors</b>                                                                    | CYP3A4             | ✓           |              | ✓ <sup>‡</sup> |
|                                                                                      |                    |             |              |                |
| <b>Other medications may increase</b>                                                | CYP2C8             | ✓           | ✓            |                |

---

**AR inhibitor concentrations**

---

|                 |        |   |                |
|-----------------|--------|---|----------------|
| <b>Inducers</b> | CYP3A4 | ✓ | ✓ <sup>§</sup> |
|-----------------|--------|---|----------------|

**Other medications may decrease AR inhibitor concentrations**

---

† Avoid concomitant use with drugs that are BCRP substrates where possible. If used together, monitor patients more frequently for adverse reactions and consider dose reduction of BCRP substrate drug. ‡If P-gp and strong CYP3A4 inhibitors are used together, monitor patients more frequently for darolutamide adverse reactions. §Avoid concomitant use of P-gp and strong or moderate CYP3A4 inducers.

AR, androgen receptor; BCRP, breast cancer resistance protein; CYP, cytochrome P450; mCRPC, metastatic castration-resistant prostate cancer; P-gp, P-glycoprotein; UGT, Uridine 5'-diphospho-glucuronosyltransferase.

**Fig. S1** *In vitro* effects of darolutamide on efflux transporters (a) P-gp, with digoxin as the probe substrate, and (b) BCRP, with cladribine as the probe substrate

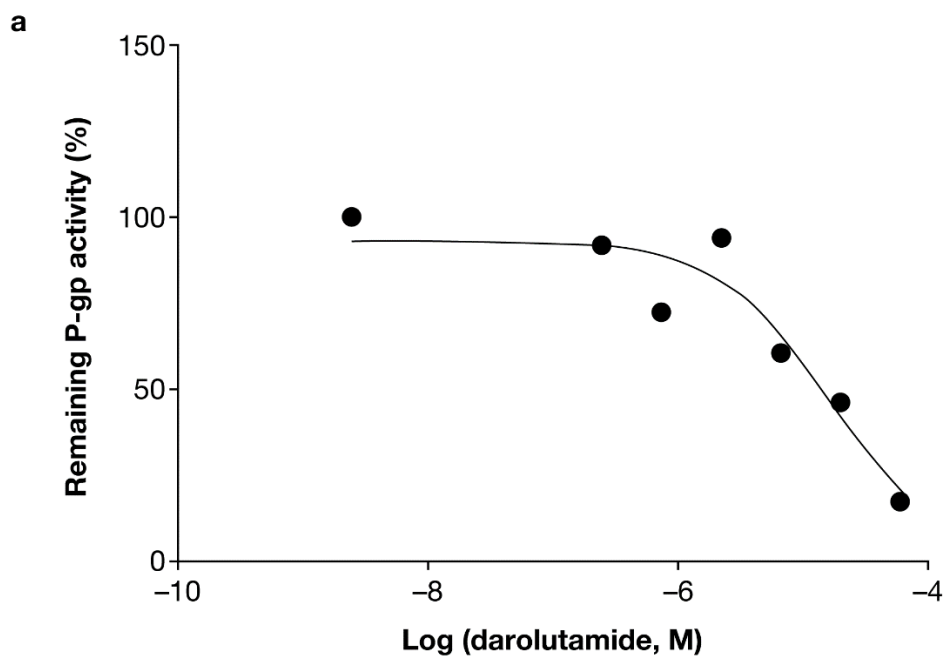

Darolutamide showed a concentration-dependent inhibition towards P-gp in Caco-2 cells, and its IC<sub>50</sub> value was 16.4  $\mu$ M

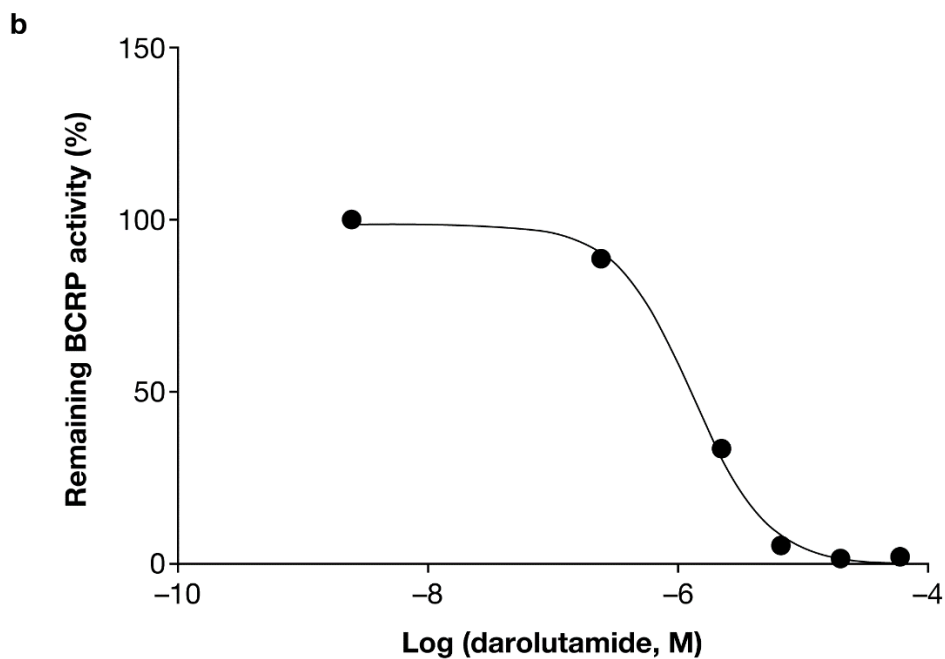

For the purpose of fitting, the data at 0.741  $\mu$ M of ODM-201 was excluded in the BCRP IC<sub>50</sub> assessment, and its IC<sub>50</sub> value was 1.33  $\mu$ M.

BCRP, breast cancer resistance protein; P-gp, P-glycoprotein.

**Fig. S2 Mean plasma concentration–time profiles of (a) darolutamide and (b) keto-darolutamide after multiple oral doses of 600 mg BID (Day 7) and given in combination with a single oral dose of 5 mg rosuvastatin (Day 8) in Treatment Period 2 (N = 29)**

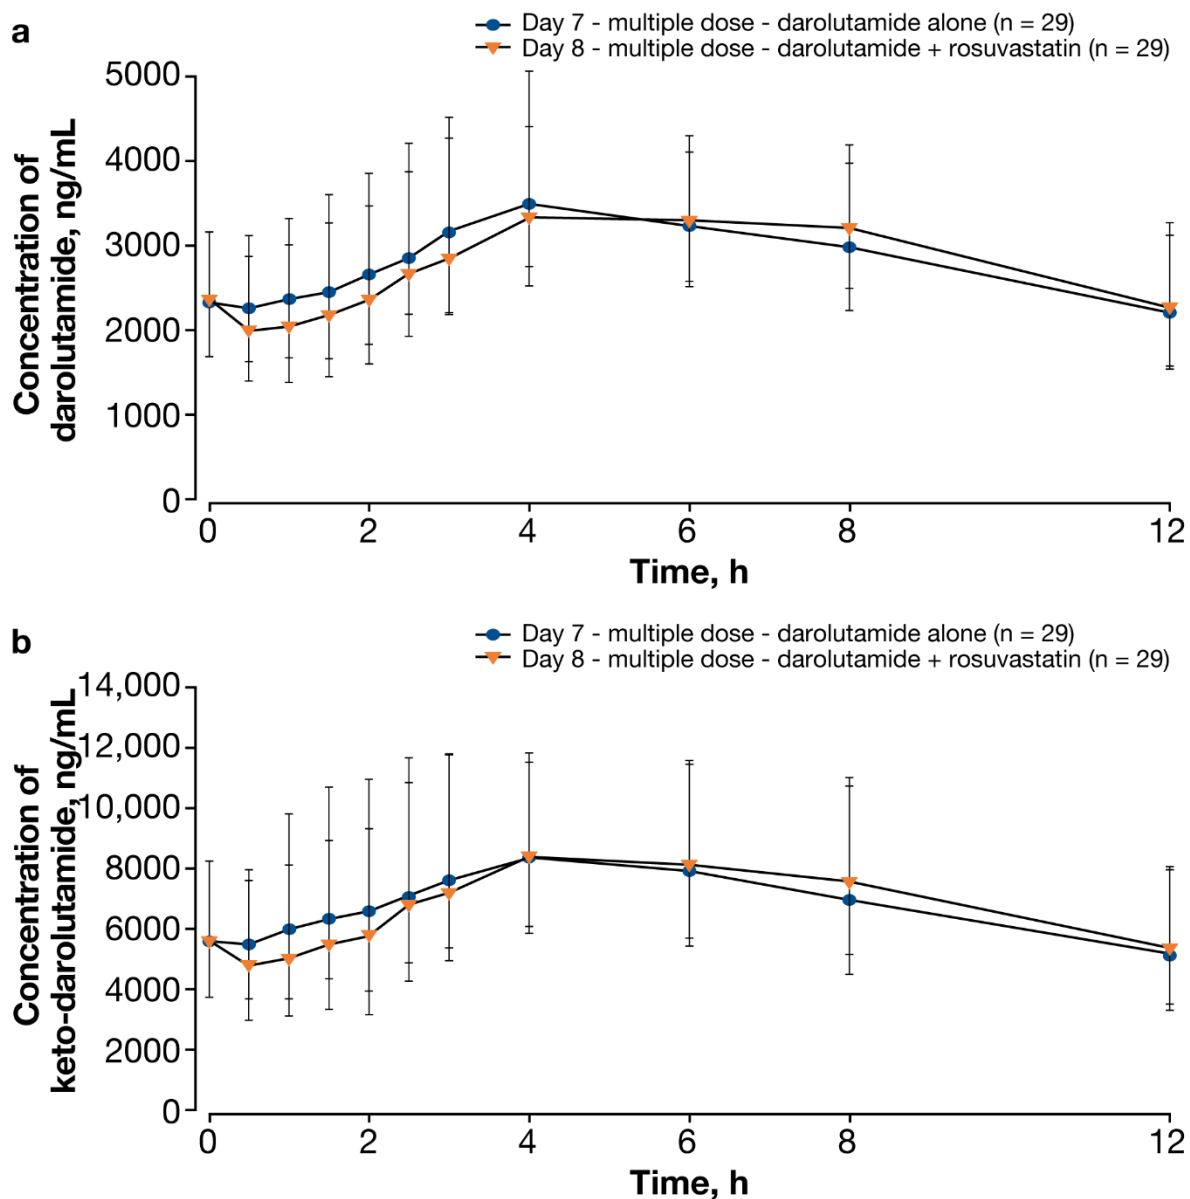

BID, twice daily.



## Supplementary Methods: Bioanalytical Methods used in the Phase I Clinical Trials

Validation of bioanalytical methods and analysis of study samples were performed in compliance with internal standard operating procedures of the clinical research organizations and regulatory guidelines on bioanalytical method validation (e.g. from the FDA and EMA [8, 9]). Bioanalytical results are summarized in the table.

To determine the concentrations of the diastereomers (*S,R*)- and (*S,S*)-darolutamide and the major metabolite, keto-darolutamide, K<sub>2</sub>EDTA plasma samples were spiked with internal standard and extracted using a solid phase extraction procedure. The extracted samples were analyzed by liquid chromatography with tandem mass spectrometry. Concentrations of darolutamide were calculated as the sum of the two diastereomers (*S,R*)- and (*S,S*)-darolutamide. All samples were stored at  $-20^{\circ}\text{C}$ ; stability data indicated that the analytes were stable for the storage period ( $\geq 506$  days and  $\leq 94$  days in the studies evaluating the effects of darolutamide on midazolam/dabigatran and rosuvastatin, respectively).

Itraconazole was determined in human K<sub>3</sub>EDTA plasma samples after addition of the internal standard itraconazole-d<sub>3</sub> and automated liquid-liquid extraction with methyl tert-butyl ether. Rifampicin was determined in human K<sub>2</sub>EDTA plasma samples after addition of the internal standard rifampin-d<sub>3</sub> and automated protein precipitation with methanol. Total dabigatran and non-conjugated dabigatran (free form) were determined in human K<sub>2</sub> EDTA plasma after addition of the internal standard dabigatran-d<sub>7</sub> and solid phase extraction. Dabigatran was found in study samples as free form and as dabigatran-acyl- $\beta$ -D-glucuronide. To obtain the total dabigatran concentrations, study samples were hydrolyzed to cleave the glucuronide from

dabigatran-acyl- $\beta$ -D-glucuronide and form free dabigatran. Midazolam and  $\alpha$ -hydroxymidazolam (1-OH midazolam) were determined in human lithium heparinized plasma after addition of the internal standards midazolam-d<sub>4</sub> and  $\alpha$ -hydroxymidazolam-d<sub>4</sub> and automated liquid-liquid extraction with methyl tert butyl ether. Rosuvastatin was determined in human EDTA K<sub>2</sub> plasma or urine after addition of the internal standard rosuvastatin-d<sub>3</sub> and automated liquid-liquid extraction with a mixture of methyl tertbutyl ether.

For agents co-administered with darolutamide, separation was achieved by means of a liquid chromatographic system. For the mass spectrometric detection, a triple quadrupole mass spectrometer in positive TurbolonSpray™ ionization mode was applied. All samples were stored at -20°C and analyzed within 50 days (itraconazole), 28 days (rifampicin), 48 days (total dabigatran), 47 days (non-conjugated dabigatran, midazolam, 1-OH midazolam), 87 days (rosuvastatin, plasma), or 90 days (rosuvastatin, urine) after sample collection; stability data indicated that the analytes were stable for these time periods.

|                                                               | Calibration range (ng/mL) |        | Mean inter-assay accuracy and precision of back-calculated concentrations <sup>a</sup> |              | Accuracy and precision of lowest calibrator (LLOQ) |              | QC samples                 |                    |              |
|---------------------------------------------------------------|---------------------------|--------|----------------------------------------------------------------------------------------|--------------|----------------------------------------------------|--------------|----------------------------|--------------------|--------------|
|                                                               | LLOQ                      | ULOQ   | Accuracy (bias), %                                                                     | Precision, % | Accuracy, %                                        | Precision, % | Concentration range, ng/mL | Accuracy (bias), % | Precision, % |
| <b>Effects of itraconazole and rifampicin on darolutamide</b> |                           |        |                                                                                        |              |                                                    |              |                            |                    |              |
| <b>(S,R)-darolutamide</b>                                     | 4.9                       | 4940   | -3.9 to 3.9                                                                            | ≤5.8         | 0.3                                                | 2.4          | 14.8 to 3950               | 0.8 to 3.0         | ≤8.3         |
| <b>(S,S)-darolutamide</b>                                     | 5.1                       | 5060   | -3.1 to 2.8                                                                            | ≤6.7         | 0.2                                                | 3.7          | 15.2 to 4050               | 1.5 to 3.8         | ≤6.5         |
| <b>Keto-darolutamide</b>                                      | 10.0                      | 10 000 | -3.9 to 3.4                                                                            | ≤5.7         | 1.1                                                | 3.1          | 30.0 to 8 000              | 3.2 to 3.7         | ≤7.9         |
| <b>Itraconazole</b>                                           | 1.0                       | 1 000  | 96.0 to 102.5                                                                          | ≤2.8         | 102.0                                              | 1.6          | 3.0 to 750                 | 92.6 to 95.7       | 0.6 to 2.5   |
| <b>Rifampicin</b>                                             | 5.0                       | 5 000  | 97.8 to 102.0                                                                          | ≤7.7         | 100.0                                              | 9.4          | 15.0 to 3750               | 85.6 to 99.6       | 2.8 to 12.5  |
| <b>Effects of darolutamide on midazolam and dabigatran</b>    |                           |        |                                                                                        |              |                                                    |              |                            |                    |              |

|                                                |       |        |               |       |       |     |               |               |            |
|------------------------------------------------|-------|--------|---------------|-------|-------|-----|---------------|---------------|------------|
| <b>(S,R)-darolutamide</b>                      | 4.9   | 4940   | 95.9 to 105.2 | ≤5.9  | 101.4 | 3.1 | 14.8 to 3950  | 99.5 to 101.8 | ≤6.1       |
| <b>(S,S)-darolutamide</b>                      | 5.1   | 5060   | 96.2 to 103.7 | ≤9.0  | 102.0 | 4.5 | 15.2 to 4050  | 96.6 to 100.5 | ≤7.2       |
| <b>Keto-darolutamide</b>                       | 10.0  | 10 000 | 98.0 to 104.0 | ≤17.1 | 101.1 | 7.8 | 30.0 to 8 000 | 98.6 to 103.2 | ≤8.2       |
| <b>Total dabigatran</b>                        | 1.0   | 400    | 97.9 to 101.0 | ≤4.7  | 99.7  | 2.6 | 3.3 to 330    | 94.5 to 95.8  | 3.3 to 5.3 |
| <b>Non-conjugated dabigatran</b>               | 1.0   | 400    | 97.6 to 101.8 | ≤5.4  | 100.0 | 6.2 | 3.0 to 300    | 97.3 to 101.7 | 2.6 to 4.7 |
| <b>Midazolam</b>                               | 0.002 | 2      | 98.9 to 101.5 | ≤4.1  | 99.5  | 3.6 | 0.006 to 1.5  | 97.3 to 101.6 | 1.8 to 2.9 |
| <b>1-OH midazolam</b>                          | 0.005 | 5      | 98.2 to 102.0 | ≤2.3  | 99.2  | 3.8 | 0.015 to 3.8  | 96.8 to 102.0 | 1.6 to 2.8 |
| <b>Effects of darolutamide on rosuvastatin</b> |       |        |               |       |       |     |               |               |            |
| <b>(S,R)-darolutamide</b>                      | 4.9   | 4940   | -3.6 to 3.8   | ≤7.0  | -0.7  | 4.7 | 14.8 to 3950  | -0.6 to 5.7   | ≤7.4       |
| <b>(S,S)-darolutamide</b>                      | 5.1   | 5060   | -4.8 to 3.7   | ≤5.4  | 3.2   | 5.4 | 15.2 to 4050  | -5.3 to 7.3   | ≤6.1       |
| <b>Keto-darolutamide</b>                       | 10.0  | 10 000 | -3.3 to 3.4   | ≤6.6  | 3.4   | 5.4 | 30.0 to 8 000 | -3.4 to 7.2   | ≤6.4       |
| <b>Rosuvastatin, plasma</b>                    | 0.05  | 15     | 98.7 to 100.7 | ≤3.4  | 100.0 | 2.8 | 0.15 to 11.3  | 97.4 to 102.4 | 3.2 to 4.7 |

|                            |   |      |               |      |      |     |            |               |              |
|----------------------------|---|------|---------------|------|------|-----|------------|---------------|--------------|
| <b>Rosuvastatin, urine</b> | 5 | 2000 | 99.4 to 101.0 | ≤2.5 | 99.6 | 3.5 | 15 to 1500 | 94.6 to 100.7 | 0.96 to 3.16 |
|----------------------------|---|------|---------------|------|------|-----|------------|---------------|--------------|

<sup>a</sup>Except LLOQ.

1-OH midazolam, α-hydroxymidazolam; LLOQ, lower limit of quantification; QC, quality control; ULOQ, upper limit of quantification.

## References

1. Astellas Pharma US Inc. Xtandi (enzalutamide) US prescribing information. 2018.

[https://www.accessdata.fda.gov/drugsatfda\\_docs/label/2018/203415s014lbl.pdf](https://www.accessdata.fda.gov/drugsatfda_docs/label/2018/203415s014lbl.pdf).

Accessed 11 Jun 2019.

2. Bayer HealthCare Pharmaceuticals Inc. Nubeqa (darolutamide) US prescribing information. 2019.

[https://www.accessdata.fda.gov/drugsatfda\\_docs/label/2019/212099Orig1s000lbl.pdf](https://www.accessdata.fda.gov/drugsatfda_docs/label/2019/212099Orig1s000lbl.pdf)

. Accessed 31 Jul 2019.

3. European Medicines Agency. Summary of product characteristics: ERLEADA.

2019. [https://www.ema.europa.eu/en/documents/product-information/erleada-epar-product-information\\_en.pdf](https://www.ema.europa.eu/en/documents/product-information/erleada-epar-product-information_en.pdf). Accessed 11 Jun 2019.

4. European Medicines Agency. Summary of product characteristics: XTANDI. 2019.

[https://www.ema.europa.eu/en/documents/product-information/xtandi-epar-product-information\\_en.pdf](https://www.ema.europa.eu/en/documents/product-information/xtandi-epar-product-information_en.pdf). Accessed 11 Jun 2019.

5. Janssen Ortho LLC. Erleada (apalutamide) US prescribing information. 2018.

[https://www.accessdata.fda.gov/drugsatfda\\_docs/label/2018/210951s000lbl.pdf](https://www.accessdata.fda.gov/drugsatfda_docs/label/2018/210951s000lbl.pdf).

Accessed 22 Jul 2019.

6. Zurth C, Graudenz K, Denner K, Vairlein M, Korjamo T, Fricke R, et al. Drug-drug interaction of darolutamide with cytochrome P450 and P-glycoprotein substrates:

results from clinical and in vitro studies. ASCO Genitourinary Cancers Symposium; San Francisco 2019.

7. Scripture CD, Figg WD. Drug interactions in cancer therapy. *Nat Rev Cancer*. 2006;6(7):546-58. doi:10.1038/nrc1887.

8. European Medicines Agency. Guideline on bioanalytical method validation. 2011. [https://www.ema.europa.eu/documents/scientific-guideline/guideline-bioanalytical-method-validation\\_en.pdf](https://www.ema.europa.eu/documents/scientific-guideline/guideline-bioanalytical-method-validation_en.pdf). Accessed 21 Feb 2019.

9. Food and Drug Administration. Bioanalytical method validation: guidance for industry. 2018. <https://www.fda.gov/downloads/Drugs/Guidances/ucm070107.pdf>. Accessed 21 Feb 2019.
